# Supplementary material
Source: Research Square preprint supplement (doi:10.21203/rs.3.rs-8972251/v1)
Supplement: Supplementary file 1 [file 42f169cf06758636a279ddaa.docx]

Table 1

| Hub genes | symbol | Degree | MCC | Closeness | EPC | Bottle Neck | EcCentricity | Betweenness |
| --- | --- | --- | --- | --- | --- | --- | --- | --- |
| Albumin | ALB | 32 | 21083928 | 37.67 | 20.3 | 2 | 0.312 | 250 |
| Apolipoprotein E | APOE | 27 | 13774920 | 35.16 | 19.7 | 21 | 0.312 | 135.4 |
| Interleukin-6 | IL6 | | 26 | | --- | | 21078840 | 34.66 | 19.3 | 4 | 0.239 | 89.5 |
| Tumor Necrosis Factor | TNF | 25 | 19774320 | 34.16 | 19.1 | 1 | 0.312 | 113.6 |
| Interleukin-1 beta | IL1B | 23 | 20473920 | 33.16 | 19.5 | 2 | 0.312 | 59.6 |
| Hypoxia Inducible Factor 1, Alpha Subunit | HIF1A | 22 | 18618013 | 32.66 | 17.8 | 4 | 0.312 | 190.1 |
| C-reactive protein | CRP | 22 | 6129600 | 32.25 | 18.2 | 1 | 0.312 | 63.75 |
| Glutathione Peroxidase 3 | GPX3 | 22 | 18665064 | 32.25 | 17.8 | 5 | 0.312 | 74 |
| Jun Proto-Oncogene | JUN | 19 | 18557412 | 30.83 | 17.8 | 2 | 0.312 | 81.9 |
| Glutamate Pyruvate Transaminase | GPT | 19 | 14567280 | 30.75 | 18.1 | 1 | 0.239 | 29.9 |
